# Supplementary material for: Hansenula polymorpha Aat2p is targeted to peroxisomes via a novel Pex20p‐dependent pathway
Source: PubMed Central journal article supplement (PMC6099311; doi:10.1002/1873-3468.13168), 2018-06-30
Supplement: FEB2-592-2466-s001.pdf [file FEB2-592-2466-s001.pdf]

## **Supporting information**

### ***Hansenula polymorpha* Aat2p is targeted to peroxisomes via a novel Pex20p dependent pathway**

Ann S. Thomas<sup>a</sup>, Arjen M. Krikken<sup>a</sup>, Rinse de Boer<sup>a</sup> and Chris Williams<sup>a</sup>

<sup>a</sup>Molecular Cell Biology, Groningen Biomolecular Sciences and Biotechnology Institute, University of Groningen, Nijenborgh 7, 9747AG Groningen, The Netherlands

#Corresponding author (c.p.williams@rug.nl)

## **Supporting materials and methods**

### *Protein purification and preparation of antibodies*

*H. polymorpha* Aat2p with a cleavable His<sub>6</sub>-GST tag was produced in *E. coli* BL21 (DE3) RIL. Cells were grown at 37°C to an OD<sub>600</sub> of 0.6 in Terrific Broth (TB) medium, transferred to 21°C and grown until an OD<sub>600</sub> of 1.5. Gene expression was induced with 0.05mM IPTG (Invitrogen) for 16 h and cells were harvested by centrifugation. Cell pellets were resuspended in lysis buffer (50mM Tris-HCl pH 7.5, 150mM NaCl, 1% glycerol, 1mM DTT, 1mg/ml lysozyme, 10µg/ml DNase) and passed two times through a French press. Cell debris was removed by centrifugation and lysates were loaded onto glutathione sepharose-4B resin (GE Healthcare) pre-equilibrated with lysis buffer. The resin was extensively washed with lysis buffer and His<sub>6</sub>-GST tagged proteins were eluted using lysis buffer containing 20mM reduced glutathione. The GST tag was cleaved from the protein using TEV protease and samples were passed over a Ni-NTA column. The concentrated protein sample was subjected to gel filtration using a Superdex 200 (16/60) column (GE Healthcare) equilibrated with 25mM Tris, 150mM NaCl, 1mM 2-mercaptoethanol, pH 7.5. The presence of purified

Aat2p was confirmed using SDS-PAGE and protein samples were sent for antibody production (Eurogentec). The properties of the resulting anti-Aat2p antibodies are shown in Figure S1.

*Construction of strains containing N-terminally tagged GFP-Aat2*

The N-terminal GFP fusion of Aat2p produced from its endogenous promoter was obtained by amplifying a 0.7 kb fragment of GFP along with the restriction sites HindIII and BamHI using pHIPZ-Pex13mGFP as template and the primers ANN PR46 and ANN PR47. Similarly, a fragment of 1.3 kb corresponding to *AAT2* was amplified incorporating BamHI and XbaI restriction sites from genomic DNA using primers ANN PR48 and ANN PR49. HindIII-BamHI digested GFP was ligated into HindIII-BamHI digested pUC19 and BamHI-XbaI digested *AAT2* was ligated with BamHI-XbaI digested pUC19. Following this, GFP was excised using HindIII and BamHI, *AAT2* was excised using BamHI and XbaI and these fragments were used in a three-way ligation with HindIII-XbaI digested pHIPN5 GFP-SKL [1] to yield pHIPN5-mGFPAat2 (pANN017). To produce the fusion protein from the endogenous promoter, the GFP-*AAT2* fragment was excised with HindIII and NsiI and ligated with HindIII-NsiI digested pANN015, resulting in the plasmid pHIPNP<sub>*AAT2*</sub>-mGFPAat2 (pANN014). StuI was used for linearization before integration into *H. polymorpha yku80* and *aat2* cells.

The plasmid pHIPX7DsRed-SKL was linearized with DraI prior to transformation into WT+GFP-AAT2 and *aat2*+GFP-AAT2 cells.

**Table S1: *H. polymorpha* strains used in this study.**

| Strains                                                                       | Characteristics                                                      | Reference  |
|-------------------------------------------------------------------------------|----------------------------------------------------------------------|------------|
| <i>yku80</i> (WT)                                                             | NCYC495, <i>leu1.1</i> YKU80:: <i>URA3</i>                           | [2]        |
| WT+AAT2-GFP                                                                   | YKU80:: <i>URA3</i> + pANN009                                        | This study |
| <i>pex1</i>                                                                   | NCYC495, <i>leu1.1</i> PEX1:: <i>URA3</i>                            | [3]        |
| <i>pex1.atg1</i>                                                              | NCYC495, <i>leu1.1</i> PEX1:: <i>URA3</i> , ATG1:: <i>HPH</i>        | This study |
| <i>pex2</i>                                                                   | NCYC495, <i>leu1.1</i> PEX2:: <i>URA3</i>                            | [4]        |
| <i>pex3</i>                                                                   | NCYC495, <i>leu1.1</i> PEX3:: <i>URA3</i>                            | [5]        |
| <i>pex5</i> ( <i>LEU2</i> marker, used for construction of <i>pex5.pex7</i> ) | NCYC495, <i>ura3</i> PEX5:: <i>LEU2</i>                              | [6]        |
| <i>pex5.pex7</i>                                                              | Segregant of cross between PEX5:: <i>LEU2</i> and PEX7:: <i>URA3</i> | This study |
| <i>pex13</i>                                                                  | NCYC495, <i>leu1.1</i> PEX13:: <i>URA3</i>                           | [4]        |
| <i>pex19</i>                                                                  | NCYC495, <i>leu1.1</i> PEX19:: <i>URA3</i>                           | [7]        |
| <i>pex20</i>                                                                  | NCYC495, <i>leu1.1</i> PEX20:: <i>URA3</i>                           | [8]        |
| WT+AAT2-GFP+Pex14-mCherry                                                     | YKU80:: <i>URA3</i> + pANN009+pHIPN-Pex14-mCherry                    | This study |
| <i>pex1.atg1</i> +AAT2-GFP+Pex14-mCherry                                      | PEX1:: <i>URA3</i> ,ATG1:: <i>HPH</i> + pANN009+pHIPN-Pex14-mCherry  | This study |
| <i>pex2</i> +AAT2-GFP+Pex14-mCherry                                           | PEX2:: <i>URA3</i> + pANN009+pHIPH-Pex14-mCherry                     | This study |
| <i>pex5.pex7</i> +AAT2-GFP+Pex14-mCherry                                      | PEX5:: <i>LEU2</i> ,PEX7:: <i>URA3</i> + pANN009+pHIPN-Pex14-mCherry | This study |
| <i>pex13</i> +AAT2-GFP+Pex14-mCherry                                          | PEX13:: <i>URA3</i> + pANN009+pHIPH-Pex14-mCherry                    | This study |
| <i>pex20</i> +AAT2-GFP+Pex14-mCherry                                          | PEX20:: <i>URA3</i> + pANN009+pHIPN-Pex14-mCherry                    | This study |
| <i>aat2</i>                                                                   | AAT2:: <i>HPH</i>                                                    | This study |
| WT+GFP-AAT2                                                                   | YKU80:: <i>URA3</i> + pANN014                                        | This study |
| WT+GFP-AAT2+DsRed-SKL                                                         | YKU80:: <i>URA3</i> + pANN014+pHIPX7-DsRed-SKL                       | This study |
| <i>aat2</i> +GFP-AAT2                                                         | AAT2:: <i>HPH</i> + pANN014                                          | This study |
| <i>aat2</i> +GFP-AAT2+DsRed-SKL                                               | AAT2:: <i>HPH</i> +pANN014+pHIPX7-DsRed-SKL                          | This study |

**Table S2: Plasmids used in this study.**

| Plasmid | Description                                                                                                   | Reference  |
|---------|---------------------------------------------------------------------------------------------------------------|------------|
| pAG32   | <i>S. cerevisiae</i> vector containing hygromycin B resistance cassette (Hph <sup>R</sup> ), Amp <sup>R</sup> | [9]        |
| pHIPH4  | pHIP vector bearing the <i>AOX</i> promoter, Amp <sup>R</sup> , Hph <sup>R</sup>                              | This study |

|                      |                                                                                                                                  |            |
|----------------------|----------------------------------------------------------------------------------------------------------------------------------|------------|
| pHIPZ4               | pHIP vector containing the <i>AOX</i> promoter, Amp <sup>R</sup> , Zeo <sup>R</sup>                                              | [10]       |
| pHIPN4               | Plasmid bearing the <i>AOX</i> promoter, Amp <sup>R</sup> , Nat <sup>R</sup>                                                     | [11]       |
| pANN016              | <i>AAT2</i> expressed from the <i>AOX</i> promoter, contains Amp <sup>R</sup> , Nat <sup>R</sup>                                 | This study |
| pHIPZ-Pex13mGFP      | <i>PEX13</i> expressed from the endogenous promoter with C-terminal GFP fusion, contains Amp <sup>R</sup> , Zeo <sup>R</sup>     | [12]       |
| pANN009              | <i>AAT2</i> expressed from the endogenous promoter with C-terminal GFP fusion, contains Amp <sup>R</sup> , Zeo <sup>R</sup>      | This study |
| pHIPN-Pex14-mCherry  | <i>PEX14</i> expressed from the endogenous promoter with C-terminal mCherry fusion, contains Amp <sup>R</sup> , Nat <sup>R</sup> | [12]       |
| pHIPH-Pex14-mCherry  | <i>PEX14</i> expressed from the endogenous promoter with C-terminal mCherry fusion, contains Amp <sup>R</sup> , Hph <sup>R</sup> | This study |
| pANN015              | <i>AAT2</i> expressed from the endogenous promoter, contains Amp <sup>R</sup> , Nat <sup>R</sup>                                 | This study |
| pDONR P4-P1R         | Multisite Gateway vector; Kan <sup>R</sup> , Cm <sup>R</sup>                                                                     | Invitrogen |
| pDONR P2R-P3         | Multisite Gateway vector; Kan <sup>R</sup> , Cm <sup>R</sup>                                                                     | Invitrogen |
| pENTR <i>ATG1</i> 5' | pDONR P4-P1R with 5' flanking region of <i>ATG1</i> ; Kan <sup>R</sup>                                                           | This study |
| pENTR <i>ATG1</i> 3' | pDONR P2R-P3 with 3' flanking region of <i>ATG1</i> ; Kan <sup>R</sup>                                                           | This study |
| pDEST-R4-R3          | Multisite Gateway donor vector; Amp <sup>R</sup> , Cm <sup>R</sup>                                                               | Invitrogen |
| pENTR221-hph         | pDONR 221 with <i>HPH</i> ; Hph <sup>R</sup> , Kan <sup>R</sup>                                                                  | [2]        |
| pARM011              | Plasmid bearing the <i>ATG1</i> deletion cassette, contains Amp <sup>R</sup> , Hph <sup>R</sup>                                  | This study |
| pETM30 <i>AAT2</i>   | His <sub>6</sub> GST- <i>Aat2</i> , for expression in <i>E. coli</i> ; Kan <sup>R</sup>                                          | This study |
| pHIPN5GFP-SKL        | GFP-SKL expressed from the <i>AMO</i> promoter, contains Amp <sup>R</sup> , Nat <sup>R</sup>                                     | [1]        |
| pANN017              | <i>AAT2</i> expressed from the <i>AMO</i> promoter with N-terminal GFP fusion, contains Amp <sup>R</sup> , Nat <sup>R</sup>      | This study |
| pANN014              | <i>AAT2</i> expressed from endogenous promoter, with N-terminal GFP fusion, contains Amp <sup>R</sup> , Nat <sup>R</sup>         | This study |
| pHIPX7DsRed-SKL      | DsRed-SKL expressed from the constitutive <i>TEF</i> promoter, contains Kan <sup>R</sup> , LEU2                                  | [13]       |

**Table S3: Oligonucleotides used in this study.**

| Primer   | Sequence                                                                  |
|----------|---------------------------------------------------------------------------|
| ANN PR15 | GATTTTGCCCTCTGTCAGGCTCGCCGAGAACCTGTTGCAGAACTC<br>CAAGGCCACACACCATAGCTTCAA |
| ANN PR16 | TCGTCCTCCCCTGTTTCATCAGCTCGGGCGTGTTGAGGATCAGA<br>GACACCGTTTTGACACTGGATGGC  |

|           |                                                          |
|-----------|----------------------------------------------------------|
| ANN PR27  | CACGTAAAGCTTACAGACTCGTGTCTATCCAG                         |
| ANN PR28  | GATACGAGATCTCACACTTCTCACACCTCGTC                         |
| ANN PR35  | GCGCAAGCTTATGACAAGATCCTTCAGCATCGAGAACATCC                |
| ANN PR51  | CGCTCTAGACTACACACTTCTCACACCTCGTCAATACAT                  |
| ARM PR 16 | GGGGACAGCTTTCTTGTACAAAGTGGCCGCCACAAATGGTGAAG<br>TCGATC   |
| ARM PR 17 | GGGGACAACCTTTGTATAATAAAGTTGCATCGAGCTTCTCGTTGCC<br>CGTGAC |
| ARM PR 18 | GGGGACAACCTTTGTATAGAAAAGTTGGGCTGGAGAACGCGGCAG<br>ATCC    |
| ARM PR 19 | GGGGACTGCTTTTTTGTACAACTTGGGGAGGGGAAGGGTACCT<br>CTC       |
| ARM PR 20 | ACAGGTCGTTGGTGACTTTAC                                    |
| ARM PR 21 | CTTCTCGTTGCCCGTGACC                                      |
| ARM PR 62 | AGGCCGTTGCGTTATGATAG                                     |
| ARM PR 63 | GGACAATGGCCGCATAACAG                                     |
| PRARM001  | ATAGCGGCCGCTTGCAGGAAGTCGACGAAAT                          |
| PRARM002  | CGGAAGCTTTTACTTGTACAGCTCGTCCA                            |
| AAT2 Ab_F | CATGCCATGGCAATGACAAGATCCTTCAGCATCG                       |
| AAT2 Ab_R | CCCAAGCTTCTACACACTTCTCACACCTCG                           |
| ANN PR83  | AAGCGGCCGCGATTTTCGGGTCCAGAGTGT                           |
| ANN PR84  | GCAAGCTTGGGGGAGAAATGGGAGGAAG                             |
| ANN PR 46 | CGCAAGCTTATGGTGAGCAAGGGCGAG                              |
| ANN PR 47 | GCGCGGATCCCTTGTACAGCTCGTCCATG                            |
| ANN PR48  | GCGCGGATCCACAAGATCCTTCAGCATCGAG                          |
| ANN PR49  | GCGCTCTAGACTACACACTTCTCACACC                             |

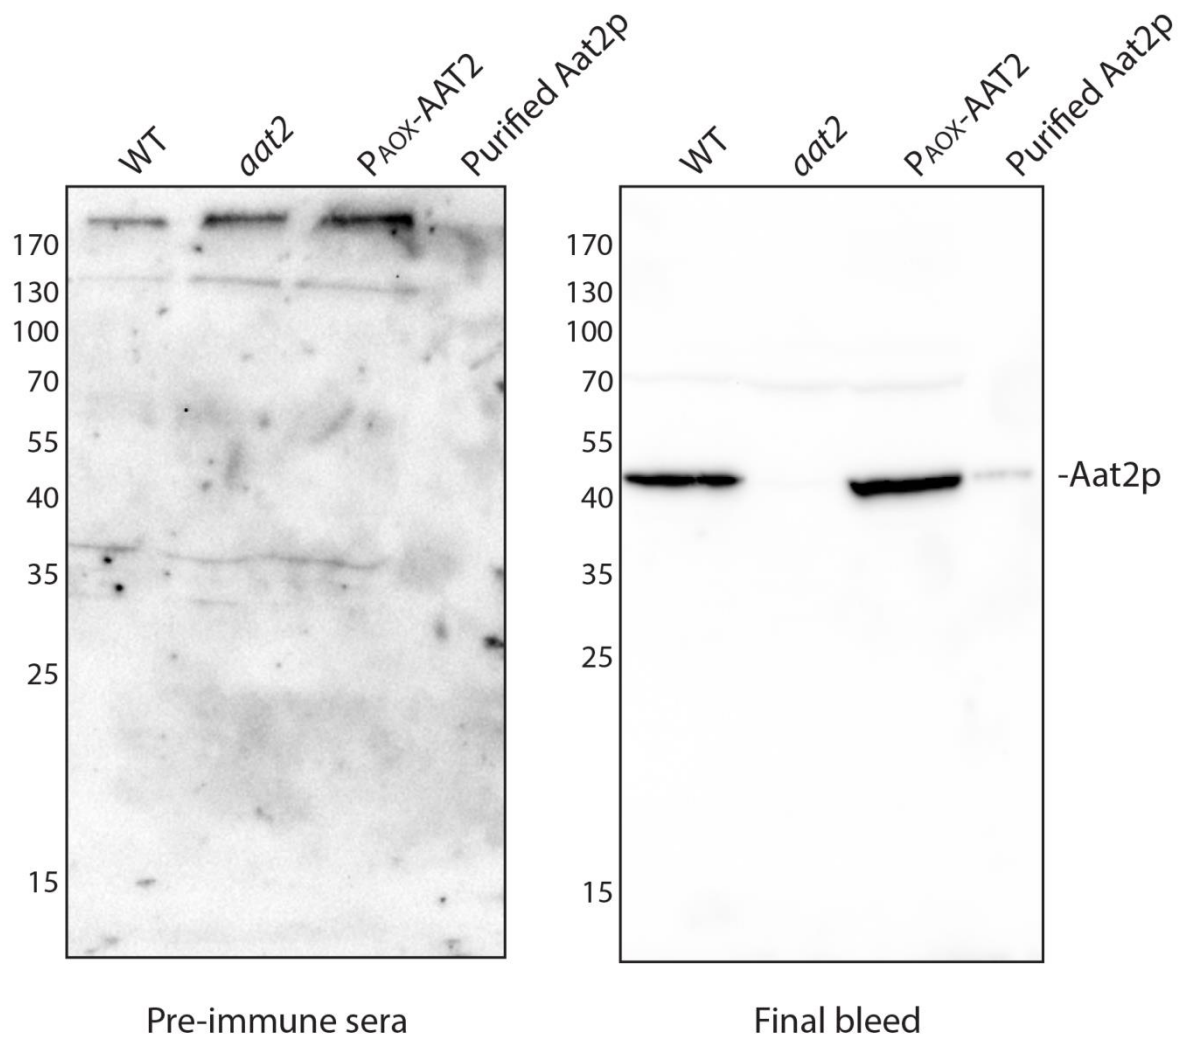

**Figure S1: Specificity of *HpAat2p* antibodies.** Western blot analysis of cell lysates from methanol grown WT cells, *aat2* cells and WT cells containing *AAT2* under control of the strong alcohol oxidase promoter (*P<sub>AOX</sub>-AAT2*), together with purified Aat2p from *E.coli*, probed with pre-immune serum (left panel) or serum from a rabbit immunogenized with purified Aat2p (right panel). Blots were exposed for 20 sec.

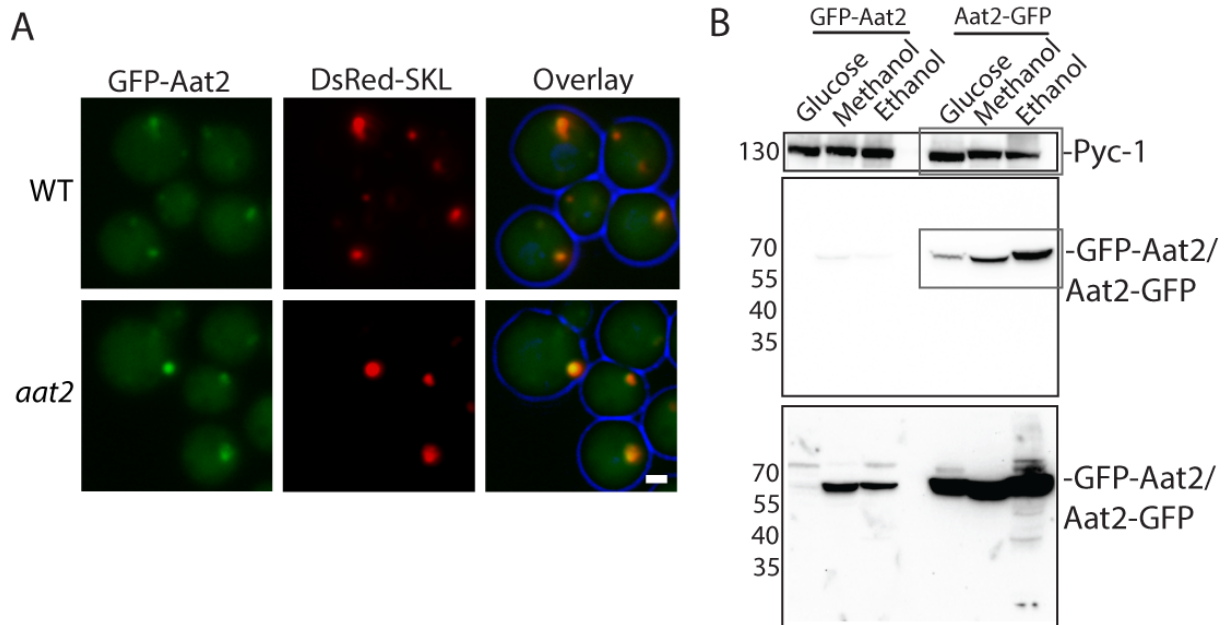

**Figure S2: N-terminally tagged GFP-Aat2 partially localises to peroxisomes. (A)** Co-localisation analysis of GFP-Aat2 in ethanol-grown WT (upper panel) or *aat2* (lower panel) cells co-expressing the peroxisomal matrix marker DsRed-SKL. Scale bar represents 1µm. **(B)** Cell lysates of WT cells grown on different carbon sources expressing Aat2p tagged with GFP either at the N- or C-terminus were subjected to SDS-PAGE and immunoblotting using antibodies directed against GFP or Pyc-1 (loading control). The two blots represent different exposures: top panel, 10 sec. exposure, bottom panel, 1000 sec. exposure. Part of this blot (boxed) is shown in Figure 2A.

## Supporting references

1. Thomas, A. S., Krikken, A. M., van der Klei, I. J. & Williams, C. (2015) Phosphorylation of Pex11p does not regulate peroxisomal fission in the yeast *Hansenula polymorpha*, *Scientific reports*. **5**, 11.
2. Saraya, R., Krikken, A. M., Kiel, J. A., Baerends, R. J., Veenhuis, M. & van der Klei, I. J. (2012) Novel genetic tools for *Hansenula polymorpha*, *FEMS Yeast Res.* **12**, 271-8.
3. Kiel, J. A., Hilbrands, R. E., van der Klei, I. J., Rasmussen, S. W., Salomons, F. A., van der Heide, M., Faber, K. N., Cregg, J. M. & Veenhuis, M. (1999) *Hansenula polymorpha* Pex1p and Pex6p are peroxisome-associated AAA proteins that functionally and physically interact, *Yeast*. **15**, 1059-78.
4. Koek, A., Komori, M., Veenhuis, M. & van der Klei, I. J. (2007) A comparative study of peroxisomal structures in *Hansenula polymorpha* pex mutants, *FEMS Yeast Res.* **7**, 1126-33.
5. Baerends, R. J., Rasmussen, S. W., Hilbrands, R. E., van der Heide, M., Faber, K. N., Reuvekamp, P. T., Kiel, J. A., Cregg, J. M., van der Klei, I. J. & Veenhuis, M. (1996) The *Hansenula polymorpha* *PER9* gene encodes a peroxisomal membrane protein essential for peroxisome assembly and integrity, *J Biol Chem.* **271**, 8887-8894.
6. Van der Klei, I. J., Hilbrands, R. E., Swaving, G. J., Waterham, H. R., Vrieling, E. G., Titorenko, V. I., Cregg, J. M., Harder, W. & Veenhuis, M. (1995) The *Hansenula polymorpha* *PER3* gene is essential for the import of PTS1 proteins into the peroxisomal matrix, *J Biol Chem.* **270**, 17229-17236.
7. Otzen, M., Perband, U., Wang, D., Baerends, R. J., Kunau, W. H., Veenhuis, M. & Van der Klei, I. J. (2004) *Hansenula polymorpha* Pex19p is essential for the formation of functional peroxisomal membranes, *J Biol Chem.* **279**, 19181-90.
8. Otzen, M., Wang, D., Lunenborg, M. G. & van der Klei, I. J. (2005) *Hansenula polymorpha* Pex20p is an oligomer that binds the peroxisomal targeting signal 2 (PTS2), *J Cell Sci.* **118**, 3409-18.
9. Schell-Steven, A., Stein, K., Amoros, M., Landgraf, C., Volkmer-Engert, R., Rottensteiner, H. & Erdmann, R. (2005) Identification of a novel, intraperoxisomal pex14-binding site in pex13: association of pex13 with the docking complex is essential for peroxisomal matrix protein import, *Mol Cell Biol.* **25**, 3007-18.
10. Salomons, F. A., Kiel, J. A., Faber, K. N., Veenhuis, M. & van der Klei, I. J. (2000) Overproduction of Pex5p stimulates import of alcohol oxidase and dihydroxyacetone synthase in a *Hansenula polymorpha* Pex14 null mutant, *J Biol Chem.* **275**, 12603-12611.
11. Cepinska, M. N., Veenhuis, M., van der Klei, I. J. & Nagotu, S. (2011) Peroxisome fission is associated with reorganization of specific membrane proteins, *Traffic.* **12**, 925-37.
12. Knoops, K., Manivannan, S., Cepinska, M. N., Krikken, A., Kram, A. M., Veenhuis, M. & Van der Klei, I. J. (2014) Preperoxisomal vesicles can form in the absence of Pex3p, *J Cell Biol* **204** 659–668.
13. Krikken, A. M., Veenhuis, M. & van der Klei, I. J. (2009) *Hansenula polymorpha* pex11 cells are affected in peroxisome retention, *FEBS J.* **276**, 1429-39.
